# Supplementary material
Source: PubMed Central journal article supplement (PMC2957537)
Supplement: NIHMS223415-supplement-01.pdf [file NIHMS223415-supplement-01.pdf]

HvABA80x1 : ---MGAFILLCLLVPLVVCVAVR--ARKGAGGR-----SSSGGKKGRLP---PGSMGVPVVGTEITQLYSSKNPNVFFARKRKNRYGFIKFKTHILGCPVMVSSPEAAKFLVLTQAHLFKPTFPASKERMLGROAI  
HvABA80x2 : ---MAFFLLLCILVSVAVVSYAHHAIRRRQGG---C-AHGRHEQAALKLP---PGSMGLPVVGTETQLYSS-ODPNSVFLSSKQKRYGFIKFKTHLLGCPVMVLSPEAARFVLVSAHLLFKPTYPRSKERLIGFSAL  
OsABA80x1 : ---MGAFLLFVQVLAFFLVCAVVR--GRRQAG-----SSEAAACGLPLP---PGSMGVPVVGTEITQLYSSKNPNVFFARKRKNRYGFIKFKTHILGCPVMVSSPEAARFVLVTOAHLLFKPTFPASKERMLGROAI  
OsABA80x2 : MAFLFFVVFVTAALVCFVVPFAFLLLCTSVQRRD---VGQGGDRWDQKKKRLP---PGSMGVPVVGTEITQLYSS-ODPNVFFASKQKRYGFIKFKTHLLGCPVMVLSPEAARFVLVSAHLLFKPTYPRSKERMIGFSAL  
OsABA80x3 : ---MAASFVIVIVISFFISLAFMCMVHYTSRQRRK-----LHGYGHEKAVRLP---PGSMGVPVVGTEITQLYSS-ODPNVFFASKQKRYGFIKFKTHLLGCPVMVLSPEAARFVLVTOAHLLFKPTYPRSKERMIGFSAL  
SbABA80x1 : ---MGALLLVQVLLAPIVLCAAVVRGSRKRSAS-----PASSCGKALPLP---PGSMGVPVVGTEITQLYSSKNPNVFFARKRKNRYGFIKFKTHILGCPVMVSSPEAARFVLVTOAHLLFKPTFPASKERMLGROAI  
SbABA80x2 : ---MAFFLLAVACIYIVFSLTLLVLLVSVRRRTTAVTAGKTGGATEQDHNKLP---PGSLGLPFLIGETLQLYT-ONPKDFASRLKRYGFIKFKTHVLCGCPVILASPEAARMVLVSAHLLFKPTYPRSKERMIGAGAL  
SbABA80x3 : ---MAFFFLILACTLIFLAAYFYQYARWQKGRG-----RS-GGGHEKQASSSKSLP---PGSMGVPVVGTEITQLYSS-ODPNVFFASKQKRYGFIKFKTHLLGCPVMVLSPEAARFVLVTOAHLLFKPTYPRSKERMIGFSAL  
ZmABA80x1a : ---MGAFLLFVQVLLAPVVLACAVRG-RKRR-AS-----SAAAGKALPLP---PGSMGVPVVGTEITQLYSSKNPNVFFARKRKNRYGFIKFKTHILGCPVMVSSPEAARFVLVTOAHLLFKPTFPASKERMLGROAI  
ZmABA80x1b : -----XKRAAAPAP-----APACGKALPLP---PGSMGVPVVGTEITQLYSSKNPNVFFARKRKNRYGFIKFKTHILGCPVMVSSPEAARFVLVTOAHLLFKPTFPASKERMLGROAI  
ZmABA80x2 : ---MAFFLAVACIYIVS-TLLVLLLDASRRR-RTTG---GGSSSTEEHKLFP---PGSLGLPFLIGETLQLYS-ONPKVFFASRLKRYGFIKFKTHVLCGCPVILASPEAARMVLVSAHLLFKPTYPRSKERMIGAGAL  
ZmABA80x3a : ---MAFFLALVQVLLILLLAASVYQYTRWQKGGK-----R-FGGHGRSAPLKLFP---PGSMGVPVVGTEITQLYSS-ODPNSVFLSSKQKRYGFIKFKTHLLGCPVMVLSPEAARFVLVTOAHLLFKPTYPRSKERMIGFSAL  
ZmABA80x3b : ---MALFFILACTLIFVALASYAQYARWQKGGK-----R-LGGHEKASSSSK-LP---PGSMGVPVVGTEITQLYSS-ODPNVFFASKQKRYGFIKFKTHLLGCPVMVLSPEAARFVLVTOAHLLFKPTYPRSKERMIGFSAL

HvABA80x1 : FFHQGDYHHLRRLRVSRFSPFAIRGSVSSIEAIALRSLGSMWEG-HEVNTFOEMKTYALNVALLSIFGE--EMQYIEELKQCYLTLEKGYNSMPVNLPGTLFHKAMKARKRLGAVIAHIIISARR-----EREGC---  
HvABA80x2 : FFHQGDYHHLRRLRVQGLPGEALRKLKLPDIEAAVRSITLAAMDGDWASTFHAMKRLSFDVCIIVIFGG-RLDERRKELRNNYAVVEKGYNSFPNSFPGLTYKAIQARRRLNGVLSDVVHERR-----ERGEHC---  
OsABA80x1 : FFHQGDYHHLRRLRVSRFSPFESIRASVPAIEAIALRSLHSDWDC-QFVNTFOEMKTYALNVALLSIFGE--EMRYIEELKQCYLTLEKGYNSMPVNLPGTLFHKAMKARKRLGAVIAHIIISARR-----ERQRG---  
OsABA80x2 : FFHQGDYHHLRRLRVQGLPGEALRKLKLPDIEAAVRSITLAAMDGDWASTFHAMKRLSFDVCIIVIFGG-RLDERRKELRNNYAVVEKGYNSFPNSFPGLTYKAIQARRRLNGVLSDVVHERR-----ERGEHC---  
OsABA80x3 : FFHQGDYHHLRRLRVQGLPGEALRKLKLPDIEAAVRSITLAAMDGDWASTFHAMKRLSFDVCIIVIFGG-RLDERRKELRNNYAVVEKGYNSFPNSFPGLTYKAIQARRRLNGVLSDVVHERR-----ERGEHC---  
SbABA80x1 : FFHQGDYHHLRRLRVSRFSPFAIRGSVPAIEAIALRSLDSDWDC-QLVNTFOEMKTYALNVALLSIFGE--EMRYIEELKQCYLTLEKGYNSMPVNLPGTLFHKAMKARKRLGAVIAHIIISARR-----ERQRG---  
SbABA80x2 : FFHQGDYHHLRRLRVQSWVGFEDALRALVPEVEAAVASTLRWEG-RVNTSFTHTMKRLTDFDVCIIVIFGR-RLADHVKEELRKHLYLVEKGYNSFPNIPVPTSYCQAIKARRRLGELSGILARRRRAR---SGDLGGCDD  
SbABA80x3 : FFHQGDYHHLRRLRVQSWVGFEDALRALVPEVEAAVASTLRWEG-RVNTSFTHTMKRLTDFDVCIIVIFGR-RLADHVKEELRKHLYLVEKGYNSFPNIPVPTSYCQAIKARRRLGELSGILARRRRAR---SGDLGGCDD  
ZmABA80x1a : FFHQGDYHHLRRLRVSRFSPFAIRGSVPAIEAIALRSLDSDWDC-RVNTSFTHTMKRLTDFDVCIIVIFGR-RLADHVKEELRKHLYLVEKGYNSFPNIPVPTSYCQAIKARRRLGELSGILARRRRAR---SGDLGGCDD  
ZmABA80x1b : FFHQGDYHHLRRLRVSRFSPFAIRGSVPAIEAIALRSLDSDWDC-RVNTSFTHTMKRLTDFDVCIIVIFGR-RLADHVKEELRKHLYLVEKGYNSFPNIPVPTSYCQAIKARRRLGELSGILARRRRAR---SGDLGGCDD  
ZmABA80x2 : FFHQGDYHHLRRLRVQGLPGEALRKLKLPDIEAAVRSITLAAMDGDWASTFHAMKRLSFDVCIIVIFGG-RLDERRKELRNNYAVVEKGYNSFPNSFPGLTYKAIQARRRLNGVLSDVVHERR-----ERGEHC---  
ZmABA80x3a : FFHQGDYHHLRRLRVQGLPGEALRKLKLPDIEAAVRSITLAAMDGDWASTFHAMKRLSFDVCIIVIFGG-RLDERRKELRNNYAVVEKGYNSFPNSFPGLTYKAIQARRRLNGVLSDVVHERR-----ERGEHC---  
ZmABA80x3b : FFHQGDYHHLRRLRVQGLPGEALRKLKLPDIEAAVRSITLAAMDGDWASTFHAMKRLSFDVCIIVIFGG-RLDERRKELRNNYAVVEKGYNSFPNSFPGLTYKAIQARRRLNGVLSDVVHERR-----ERGEHC---

HvABA80x1 : SDLLGSLFDGREA-----LTDQIADNVAIGVIFAARDTTASVLTWVVKFLGDNPAVLKAVIEEQAIEARSKGSS-GEPLWADTRRMRVTSRVIQETMRVASILSFTFREAADVVEYQGYLIPKGWKVPLPFRNI  
HvABA80x2 : DDLLGCLMRSRAGGDDADDEGALLTDQIADNVAIGVIFAARDTTASVLTWVVKFLGDNPAVLKAVIEEQAIEARSKGSS-GEPLWADTRRMRVTSRVIQETMRVASILSFTFREAADVVEYQGYLIPKGWKVPLPFRNI  
OsABA80x1 : NDLLGSLFDGREA-----LTDQIADNVAIGVIFAARDTTASVLTWVVKFLGDNPAVLKAVIEEQAIEARSKGSS-GEPLWADTRRMRVTSRVIQETMRVASILSFTFREAADVVEYQGYLIPKGWKVPLPFRNI  
OsABA80x2 : DDLLGCLMRSRDDGTAG--AVALTDQIADNVAIGVIFAARDTTASVLTWVVKFLGDNPAVLKAVIEEQAIEARSKGSS-GEPLWADTRRMRVTSRVIQETMRVASILSFTFREAADVVEYQGYLIPKGWKVPLPFRNI  
OsABA80x3 : SDLLGCLMRSRAGGDDADDEGALLTDQIADNVAIGVIFAARDTTASVLTWVVKFLGDNPAVLKAVIEEQAIEARSKGSS-GEPLWADTRRMRVTSRVIQETMRVASILSFTFREAADVVEYQGYLIPKGWKVPLPFRNI  
SbABA80x1 : RDLLASFLDDREA-----LTDQIADNVAIGVIFAARDTTASVLTWVVKFLGDNPAVLKAVIEEQAIEARSKGSS-GEPLWADTRRMRVTSRVIQETMRVASILSFTFREAADVVEYQGYLIPKGWKVPLPFRNI  
SbABA80x2 : DDLLNTLMRYRDDTGAA-----LSDDQIADNVAIGVIFAARDTTASVLTWVVKFLGDNPAVLKAVIEEQAIEARSKGSS-GEPLWADTRRMRVTSRVIQETMRVASILSFTFREAADVVEYQGYLIPKGWKVPLPFRNI  
SbABA80x3 : TDLLGCLMRSRAGGDDADDEGALLTDQIADNVAIGVIFAARDTTASVLTWVVKFLGDNPAVLKAVIEEQAIEARSKGSS-GEPLWADTRRMRVTSRVIQETMRVASILSFTFREAADVVEYQGYLIPKGWKVPLPFRNI  
ZmABA80x1a : SDLLASFLDDREA-----LTDQIADNVAIGVIFAARDTTASVLTWVVKFLGDNPAVLKAVIEEQAIEARSKGSS-GEPLWADTRRMRVTSRVIQETMRVASILSFTFREAADVVEYQGYLIPKGWKVPLPFRNI  
ZmABA80x1b : SDLLASFLDDREA-----LTDQIADNVAIGVIFAARDTTASVLTWVVKFLGDNPAVLKAVIEEQAIEARSKGSS-GEPLWADTRRMRVTSRVIQETMRVASILSFTFREAADVVEYQGYLIPKGWKVPLPFRNI  
ZmABA80x2 : HGLLNALMRSRDDSGAAP---PLSDDQIADNVAIGVIFAARDTTASVLTWVVKFLGDNPAVLKAVIEEQAIEARSKGSS-GEPLWADTRRMRVTSRVIQETMRVASILSFTFREAADVVEYQGYLIPKGWKVPLPFRNI  
ZmABA80x3a : TGLLGCLMRSRAGGDDADDEGALLTDQIADNVAIGVIFAARDTTASVLTWVVKFLGDNPAVLKAVIEEQAIEARSKGSS-GEPLWADTRRMRVTSRVIQETMRVASILSFTFREAADVVEYQGYLIPKGWKVPLPFRNI  
ZmABA80x3b : TDLLGCLMRSRAGGDDADDEGALLTDQIADNVAIGVIFAARDTTASVLTWVVKFLGDNPAVLKAVIEEQAIEARSKGSS-GEPLWADTRRMRVTSRVIQETMRVASILSFTFREAADVVEYQGYLIPKGWKVPLPFRNI

HvABA80x1 : HHPDHFQDPKDFDPSRFVAPKPNTEFPFGNGTHSCPGNELAKLEMLVLEHLLVTKYRWSTSKSESGVQFGPFALELNGIPMTFTRKA-----  
HvABA80x2 : HHPDHFQDPKDFDPSRFVAPKPNTEFPFGNGTHSCPGNELAKLEMLVLEHLLVTKYRWSTSKSESGVQFGPFALELNGIPMTFTRKA-----  
OsABA80x1 : HHPDHFQDPKDFDPSRFVAPKPNTEFPFGNGTHSCPGNELAKLEMLVLEHLLVTKYRWSTSKSESGVQFGPFALELNGIPMTFTRKA-----  
OsABA80x2 : HHPDHFQDPKDFDPSRFVAPKPNTEFPFGNGTHSCPGNELAKLEMLVLEHLLVTKYRWSTSKSESGVQFGPFALELNGIPMTFTRKA-----  
OsABA80x3 : HHPDHFQDPKDFDPSRFVAPKPNTEFPFGNGTHSCPGNELAKLEMLVLEHLLVTKYRWSTSKSESGVQFGPFALELNGIPMTFTRKA-----  
SbABA80x1 : HHPDHFQDPKDFDPSRFVAPKPNTEFPFGNGTHSCPGNELAKLEMLVLEHLLVTKYRWSTSKSESGVQFGPFALELNGIPMTFTRKA-----  
SbABA80x2 : HHPDHFQDPKDFDPSRFVAPKPNTEFPFGNGTHSCPGNELAKLEMLVLEHLLVTKYRWSTSKSESGVQFGPFALELNGIPMTFTRKA-----  
SbABA80x3 : HHPDHFQDPKDFDPSRFVAPKPNTEFPFGNGTHSCPGNELAKLEMLVLEHLLVTKYRWSTSKSESGVQFGPFALELNGIPMTFTRKA-----  
ZmABA80x1a : HHPDHFQDPKDFDPSRFVAPKPNTEFPFGNGTHSCPGNELAKLEMLVLEHLLVTKYRWSTSKSESGVQFGPFALELNGIPMTFTRKA-----  
ZmABA80x1b : HHPDHFQDPKDFDPSRFVAPKPNTEFPFGNGTHSCPGNELAKLEMLVLEHLLVTKYRWSTSKSESGVQFGPFALELNGIPMTFTRKA-----  
ZmABA80x2 : HHPDHFQDPKDFDPSRFVAPKPNTEFPFGNGTHSCPGNELAKLEMLVLEHLLVTKYRWSTSKSESGVQFGPFALELNGIPMTFTRKA-----  
ZmABA80x3a : HHPDHFQDPKDFDPSRFVAPKPNTEFPFGNGTHSCPGNELAKLEMLVLEHLLVTKYRWSTSKSESGVQFGPFALELNGIPMTFTRKA-----  
ZmABA80x3b : HHPDHFQDPKDFDPSRFVAPKPNTEFPFGNGTHSCPGNELAKLEMLVLEHLLVTKYRWSTSKSESGVQFGPFALELNGIPMTFTRKA-----

**Supplementary Fig. S1.** Multiple alignment of proteins encoded by ABA 8'-hydroxylase genes of maize (Zm) and orthologs from *Oryza sativa* (Os), *Sorghum bicolor* (Sb) and *Barley* (Hv).
